# Supplementary material for: Popliteal artery damage during total knee arthroplasty
Source: PubMed Central journal article supplement — Arthroplast Today. 2015 Sep 2;1(3):53–7. doi: 10.1016/j.artd.2015.06.001 (PMC4956686; doi:10.1016/j.artd.2015.06.001), 2015-09-02
Supplement: mmc3.pdf [file mmc3.pdf]

**Bmed**  
**CONFLICT OF INTEREST STATEMENT**  
*Arthroplasty Today*

(Adopted from the American Academy of Orthopaedic Surgeons disclosure statement)

The following form must be filled out completely and submitted by each author (example, 6 authors, 6 forms). If no discloser is required, please write/type "none" at the end of each sentence.

Manuscript Title : Vascular complications during total knee arthroplasty: Two case reports and review of the literature

1. Royalties from a company or supplier (The following conflicts were disclosed)      None
  
2. Speakers bureau/paid presentations for a company or supplier (The following conflicts were disclosed)      None
  
- 3A. Paid employee for a company or supplier (The following conflicts were disclosed)      None
  
- 3B. Paid consultant for a company or supplier (The following conflicts were disclosed)      None
  
- 3C. Unpaid consultants for a company or supplier (The following conflicts were disclosed)      None
  
4. Stock or stock options in a company or supplier (The following conflicts were disclosed)      None
  
5. Research support from a company or supplier as a Principal Investigator (The following conflicts were disclosed)  
None
  
6. Other financial or material support from a company or supplier (The following conflicts were disclosed)      None
  
7. Royalties, financial or material support from publishers (The following conflicts were disclosed)      None
  
8. Medical/Orthopaedic publications editorial/governing board (The following conflicts were disclosed)      None
  
9. Board member/committee appointments for a society (The following conflicts were disclosed)      None

**Each author must sign AND print or type his/her name, date and submit a separate form**

In addition, one BLINDED Conflict of Interest form (no author names used) should be submitted per manuscript with all author disclosures.

Alexandros Mavrodontidis  
Author Name (Print or Type)

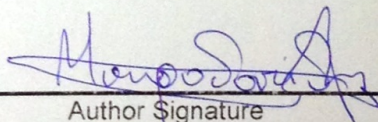  
Author Signature

20/4/2015  
Date
